# Supplementary material for: Computational Methods for Understanding the Selectivity and Signal Transduction Mechanism of Aminomethyl Tetrahydronaphthalene to Opioid Receptors
Source: MDPI journal article supplement (doi:10.3390/molecules27072173), 2022-03-28
Supplement: s1 [file s1]

# Computational Methods for Understanding the Selectivity and Signal Transduction Mechanism of Aminomethyl Tetrahydronaphthalene to Opioid Receptors

Peng Xie <sup>1,2</sup>, Junjie Zhang <sup>1</sup>, Baiyu Chen <sup>1</sup>, Xinwei Li <sup>1</sup>, Wenbo Zhang <sup>2</sup>, Mengdan Zhu <sup>1</sup>, Wei Li <sup>1</sup>, Jianqi Li <sup>2,\*</sup> and Wei Fu <sup>1,\*</sup>

<sup>1</sup> School of Pharmacy, Fudan University, Shanghai 201301, P. R. China;

<sup>2</sup> Novel Technology Center of Chemical Pharmaceutics, China State Institute of Pharmaceutical Industry, Shanghai 201203, P. R. China.

\* Correspondence: wfu@fudan.edu.cn

## Supporting Material

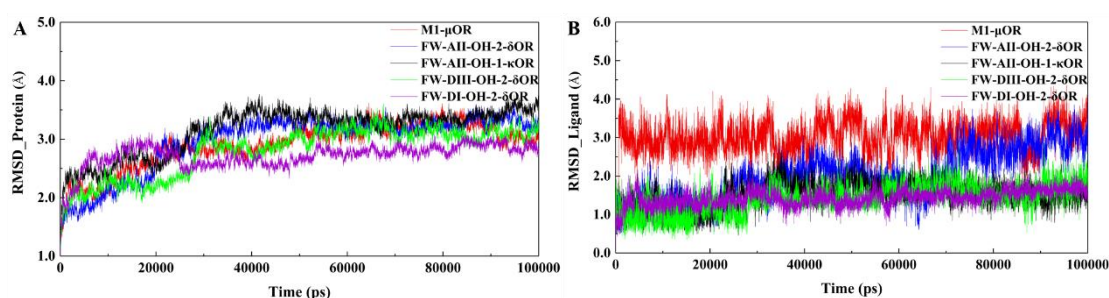

**Figure S1.** The RMSD values of the protein (A) and ligand (B) in the simulation time.

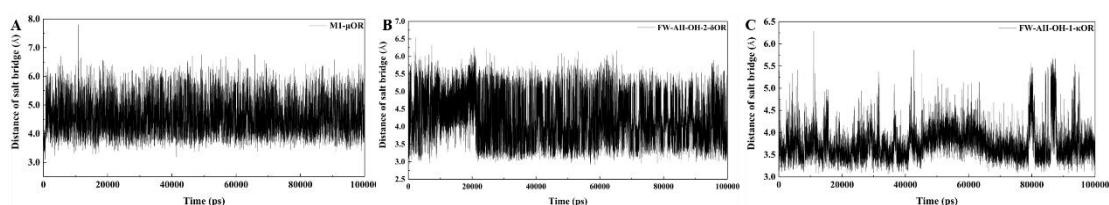

**Figure S2.** The distances of salt bridges between D<sup>3.32</sup> and amine groups in M1 (A), FW-AII-OH-2 (B) and FW-AII-OH-1 (C).

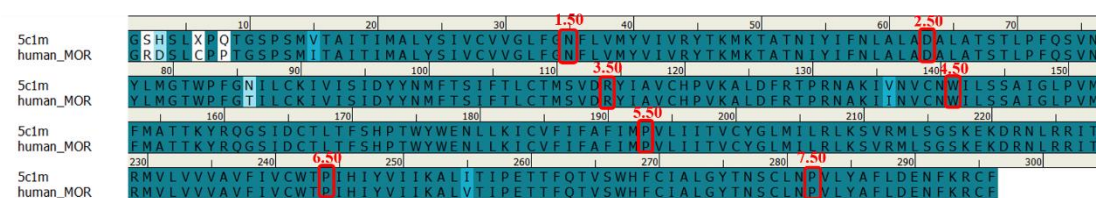

**Figure S3.** Result of sequence alignment between human MOR and mouse MOR.

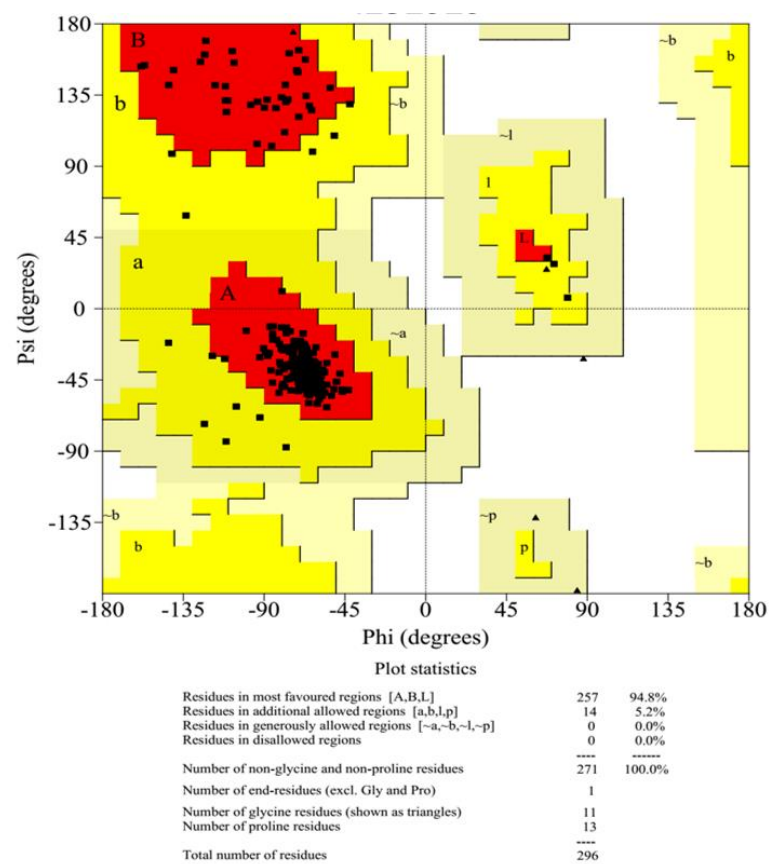

Figure S4. Main Ramachandran plot of active MOR homology structure.

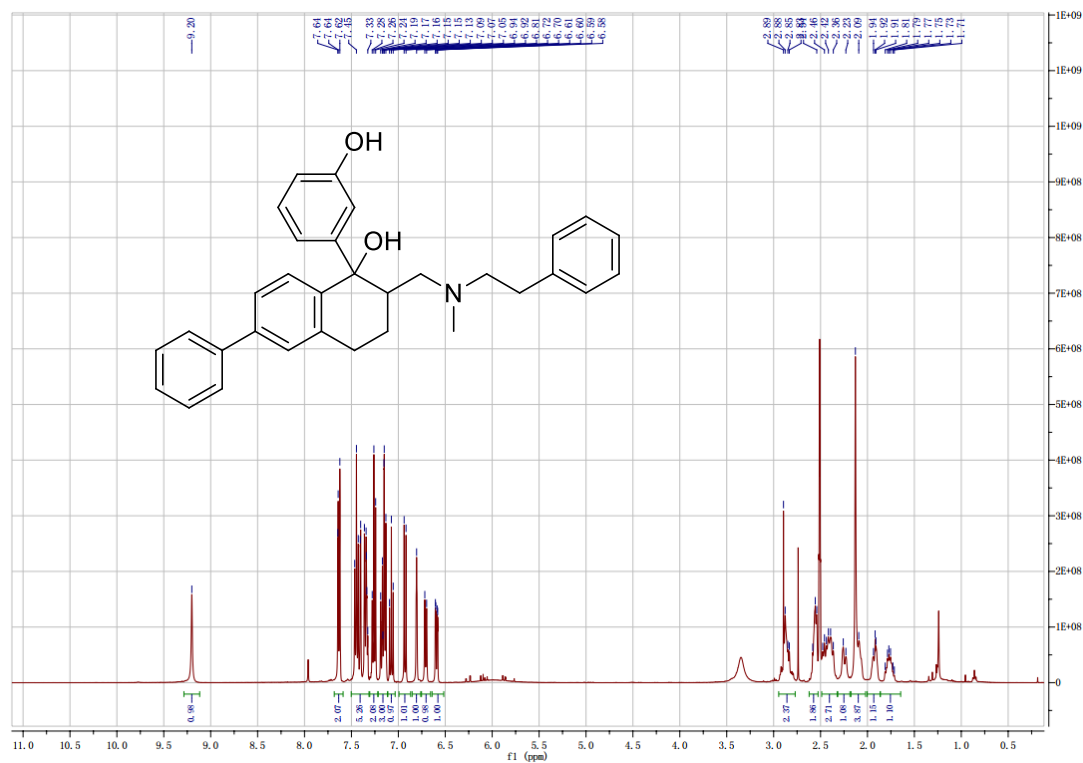

Figure S5. <sup>1</sup>H NMR Spectroscopic Data of FW-DIII-OH-2.

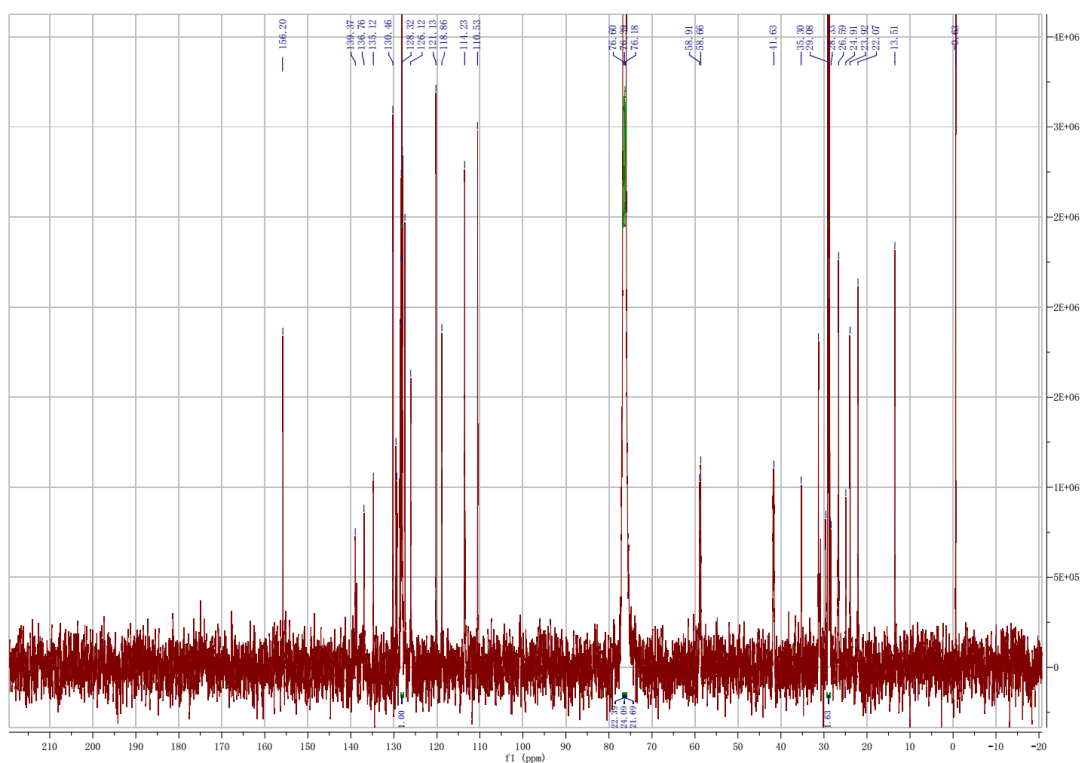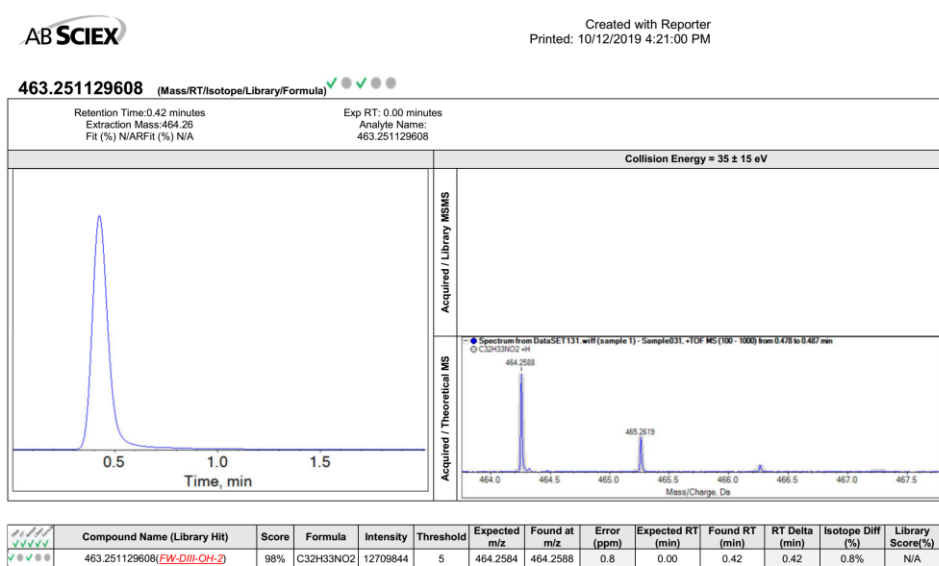

FW-DI-OH-2

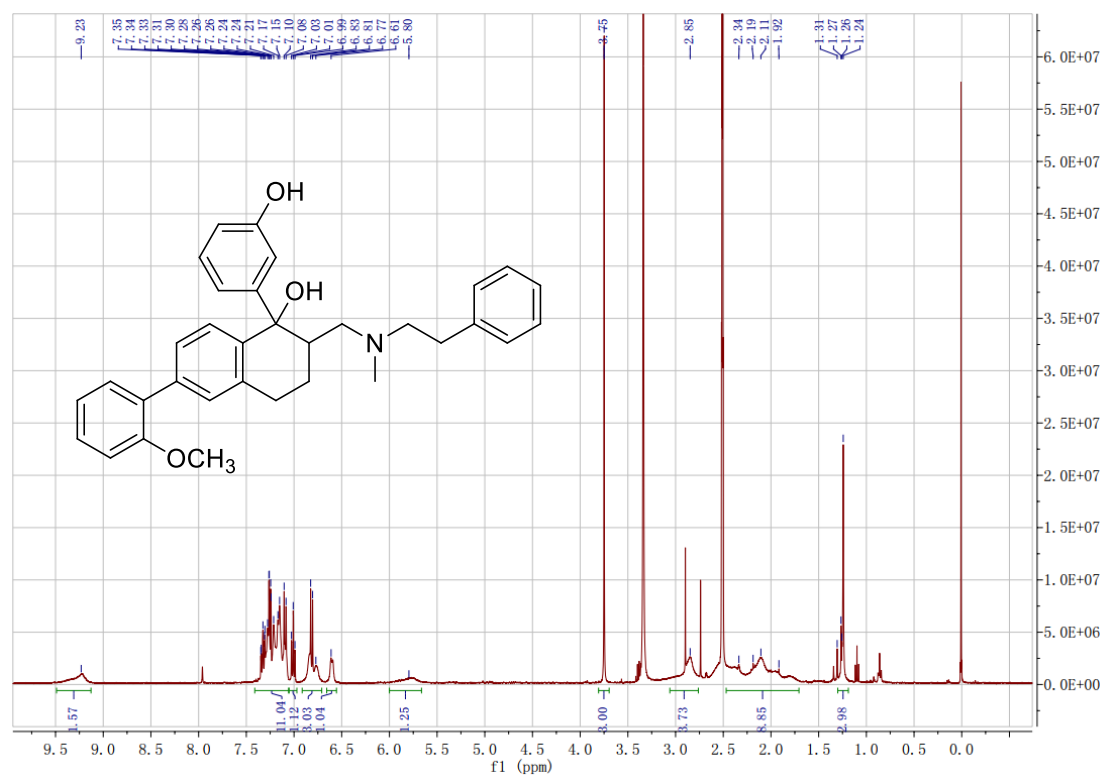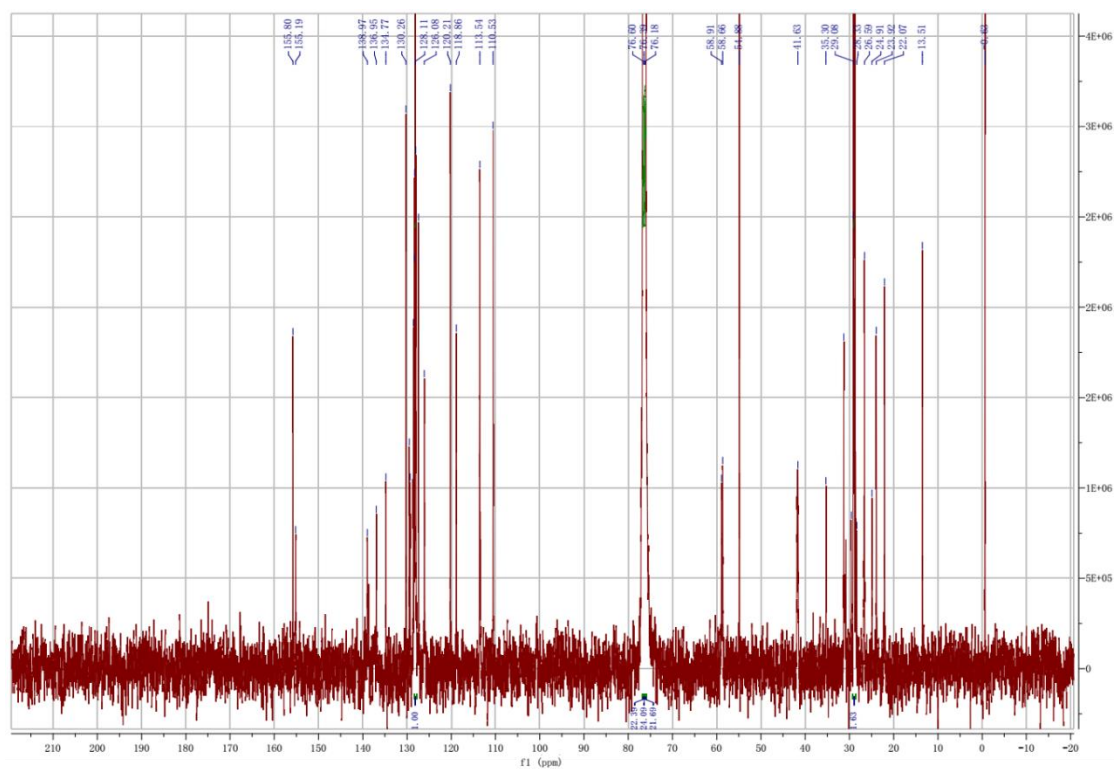

493.261694328 (Mass/RT/Isotope/Library/Formula) ✓✓✓

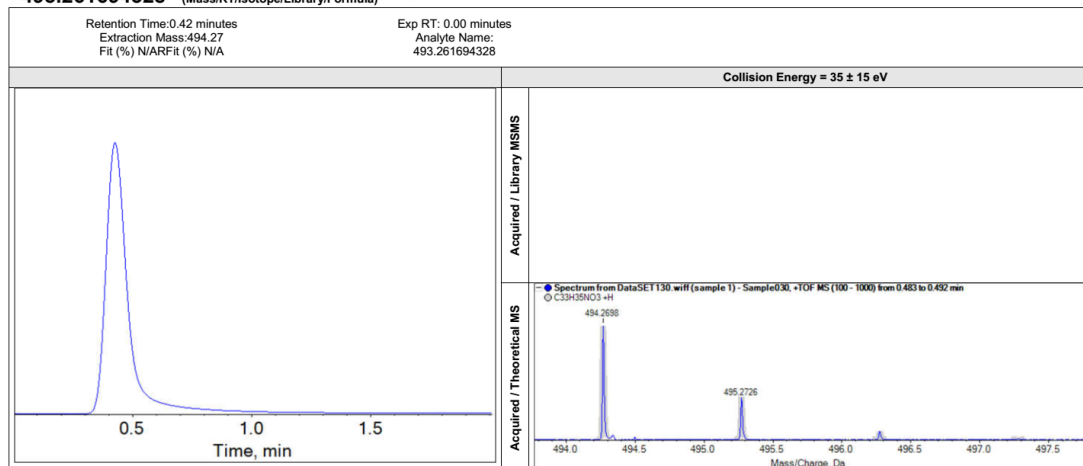

Figure S10. HRMS Spectroscopic Data of FW-DI-OH-2.

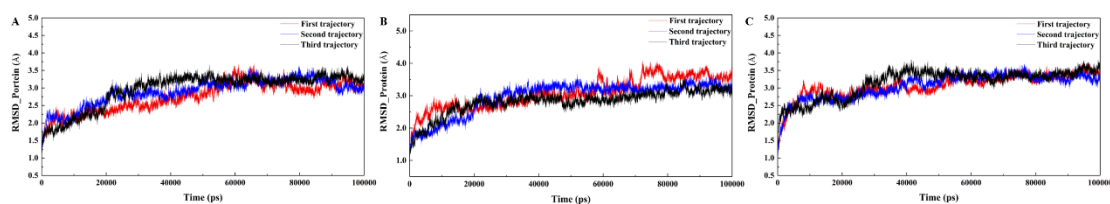

Figure S11. The RMSD values of the proteins (A). M1-MOR complex, (B). FW-AII-OH-2-DOR complex, (C). FW-AII-OH-1-KOR complex.

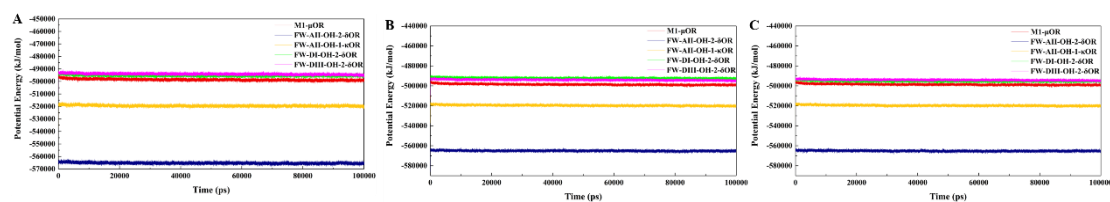

Figure S12. The time evolved potential energy profile of complexes (A). First trajectory, (B) Second trajectory, (C) Third trajectory.

### M1-MOR complex

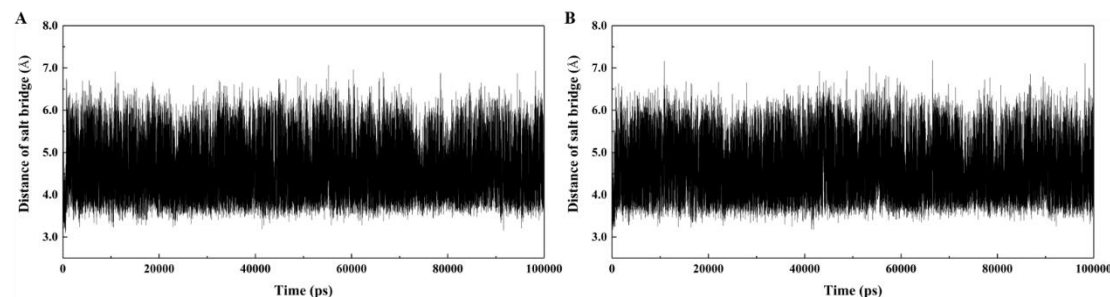

Figure S13. The distances of salt bridges between D<sup>3.32</sup> and amine groups. (A). The second trajectory, (B). The third trajectory.

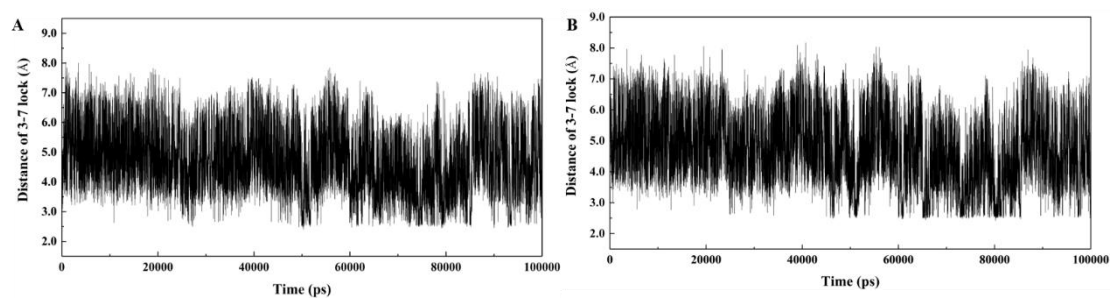

**Figure S14.** The distances of hydrogen bonds between D<sup>3.32</sup> and Y<sup>7.43</sup> (3-7lock). (A). The second trajectory, (B). The third trajectory.

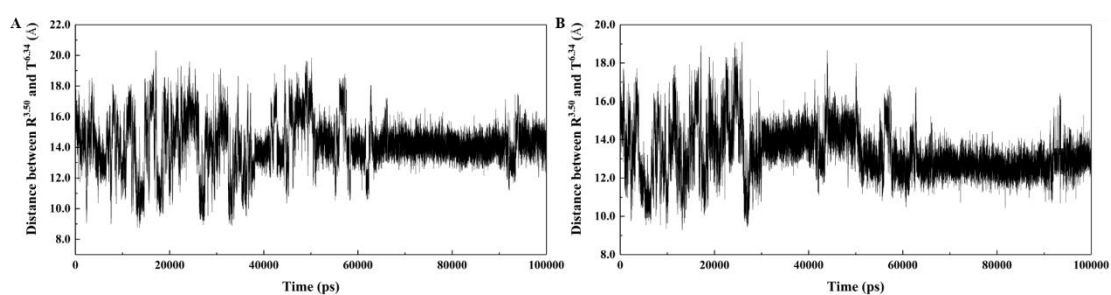

**Figure S15.** Variation of the distance between R<sup>3.50</sup> and T<sup>6.34</sup>. (A). The second trajectory, (B). The third trajectory.

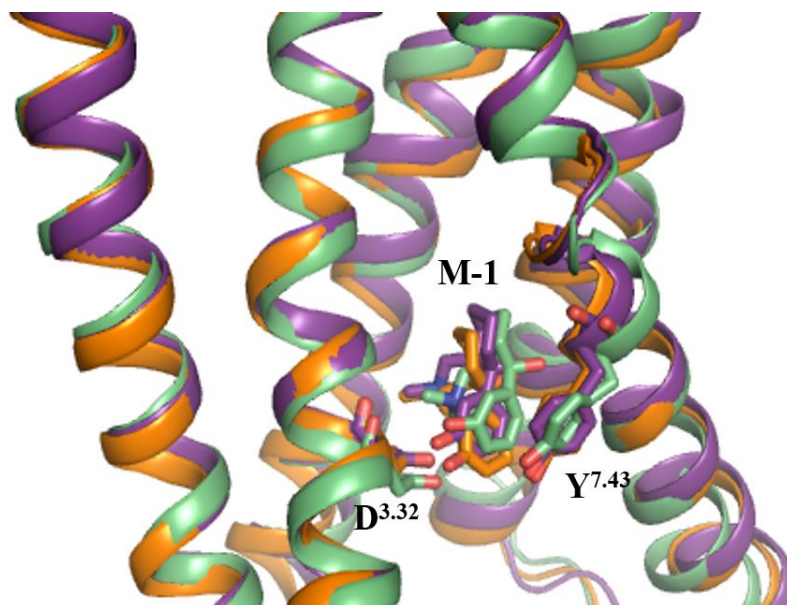

**Figure S16.** The alignment of binding mode in three trajectories.

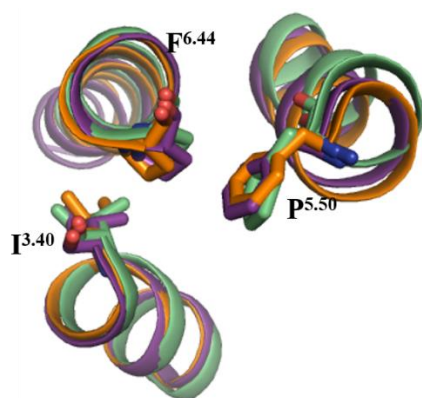

**Figure S17.** The alignment of I<sup>3.40</sup>, P<sup>5.50</sup> and F<sup>6.44</sup> in three trajectories.

# FW-AII-OH-2-DOR complex

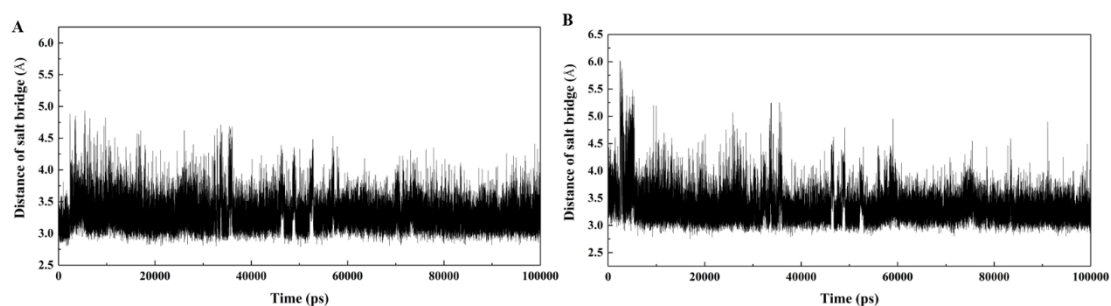

**Figure S18.** The distances of salt bridges between D<sup>3.32</sup> and amine groups. (A). The second trajectory, (B). The third trajectory.

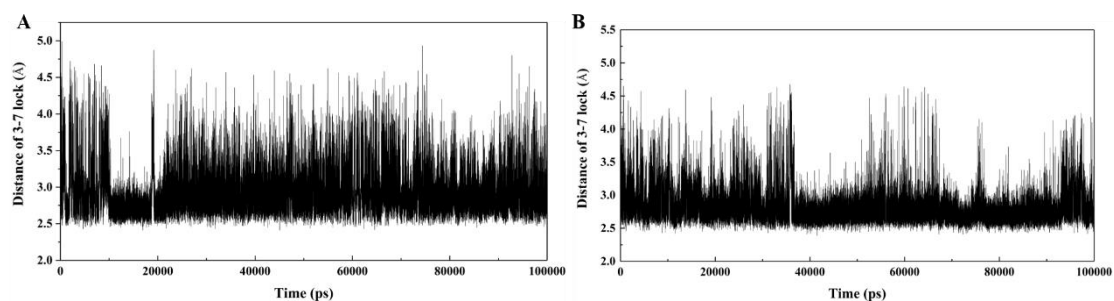

**Figure S19.** The distances of hydrogen bonds between D<sup>3.32</sup> and Y<sup>7.43</sup> (3-7lock). (A). The second trajectory, (B). The third trajectory.

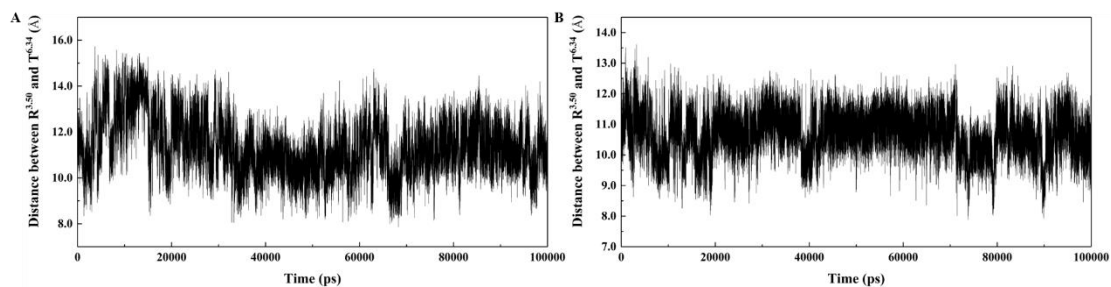

**Figure S20.** Variation of the distance between R<sup>3.50</sup> and T<sup>6.34</sup>. (A). The second trajectory, (B). The third trajectory.

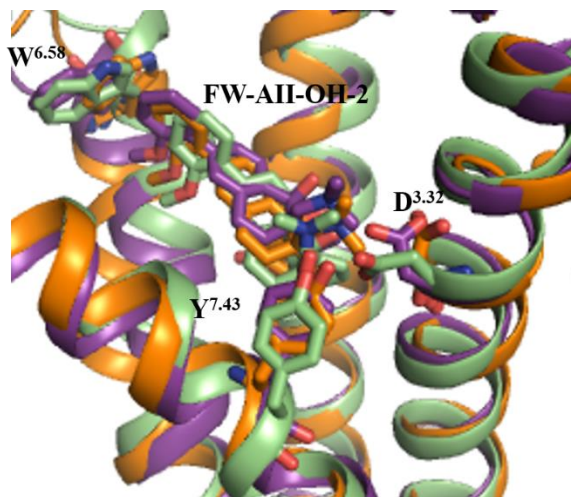

**Figure S21.** The alignment of binding mode in three trajectories.

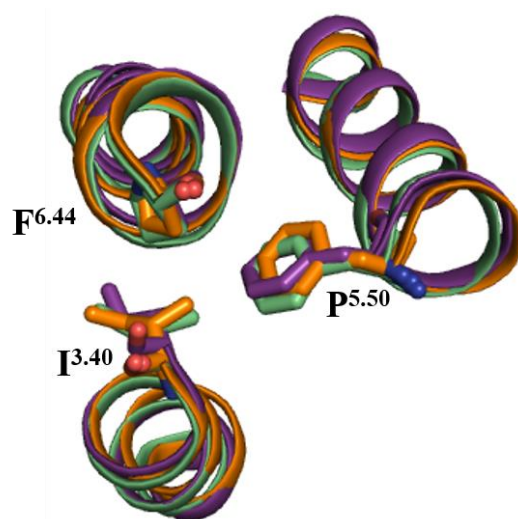

**Figure S22.** The alignment of I<sup>3.40</sup>, P<sup>5.50</sup> and F<sup>6.44</sup> in three trajectories.

#### FW-AII-OH-1-KOR complex

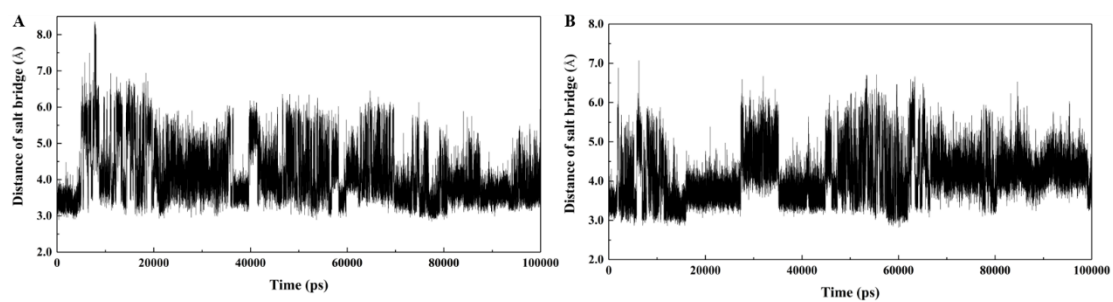

**Figure S23.** The distances of salt bridges between D<sup>3.32</sup> and amine groups. (A). The second trajectory, (B). The third trajectory.

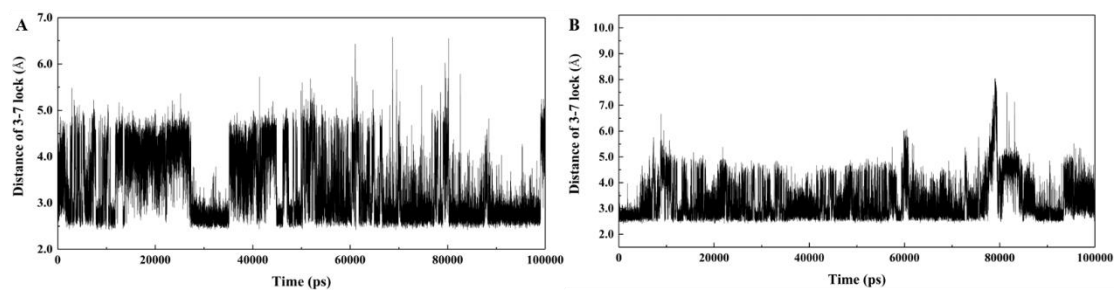

**Figure S24.** The distances of hydrogen bonds between D<sup>3.32</sup> and Y<sup>7.43</sup> (3-7lock). (A). The second trajectory, (B). The third trajectory.

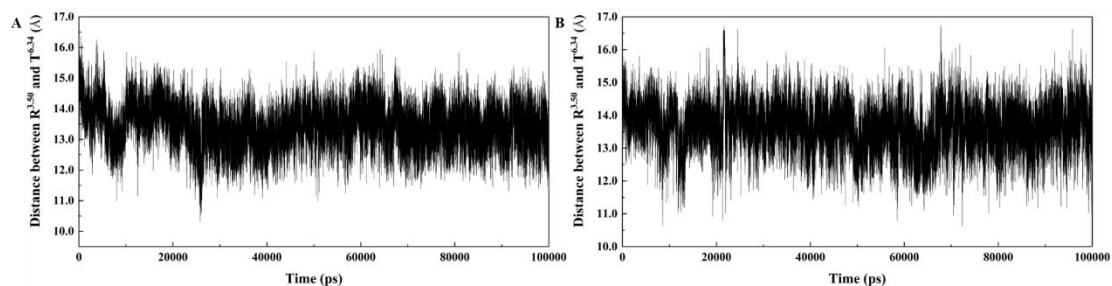

**Figure S25.** Variation of the distance between R<sup>3.50</sup> and T<sup>6.34</sup>. (A). The second trajectory, (B). The third trajectory.

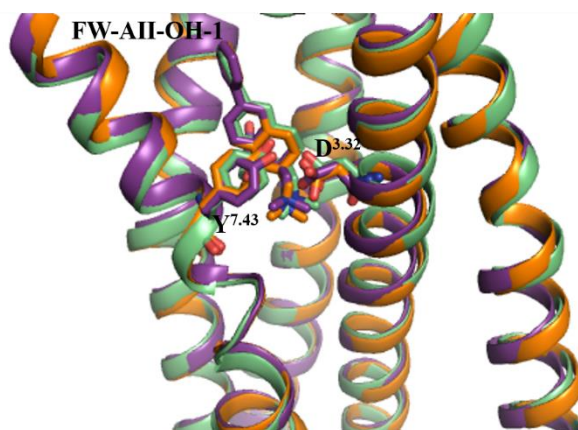

**Figure S26.** The alignment of binding mode in three trajectories.

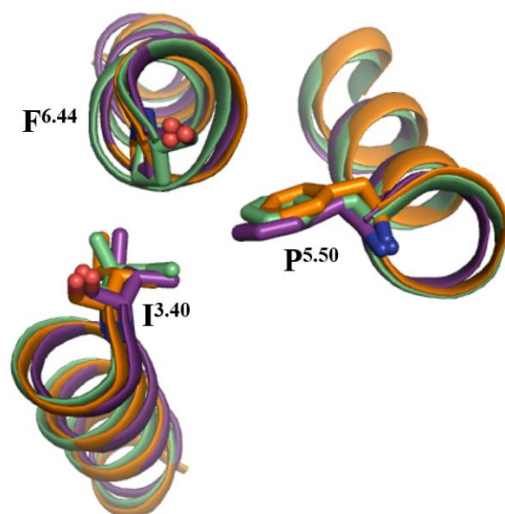

**Figure S27.** The alignment of I<sup>3.40</sup>, P<sup>5.50</sup> and F<sup>6.44</sup> in three trajectories.

FW-DI-OH-2-DOR complex:

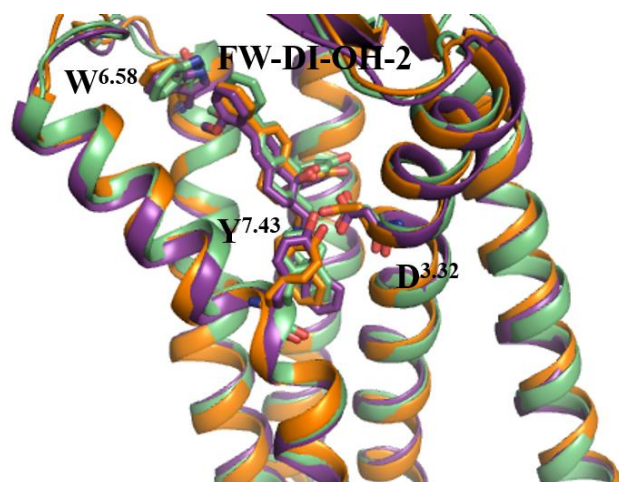

**Figure S28.** The alignment of binding mode in three trajectories.

FW-DIII-OH-2-DOR complex:

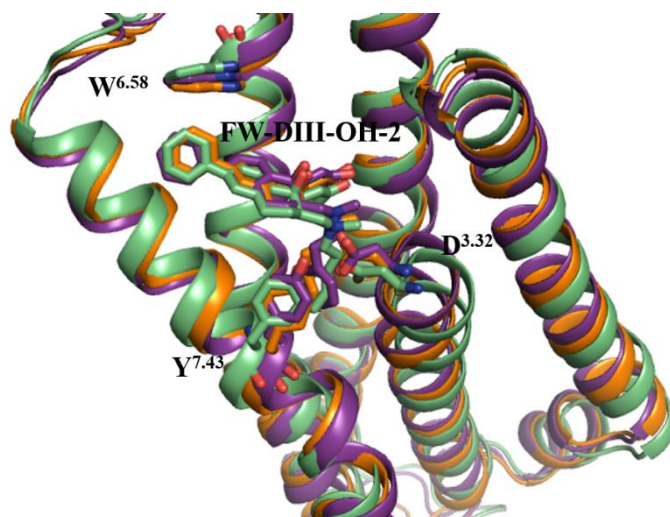

**Figure S29.** The alignment of binding mode in three trajectories.
